# Supplementary material for: Interpretation of spectroscopic data using molecular simulations for the secondary active transporter BetP
Source: PubMed Central journal article supplement (PMC6400524; doi:10.1085/jgp.201812111), 2019-03-04
Supplement: JGP_201812111_TextS1.pdf [file JGP_201812111_TextS1.pdf]

## Supporting Information: EBMetaD command files

### COLVARS format

```

# output frequency
colvarsTrajFrequency 250

# selection of groups for defining a distance, with the center
# of mass of the N and O atoms from the spin label on 450 and
# the center of mass of the N and O atoms from the spin label on 516

colvar {
  # name of the distance colvar
  name dist_450_516
  distance {
    # selection of the N and O atoms of label on 450
    group1 {
      atomNumbers {
        6004 6005
      }
    }
    group2 {
      # selection of the N and O atoms of label on 516
      atomNumbers {
        6980 6981
      }
    }
  }
}
###boundary condition to prevent sampling of
###regions outside of the distribution
# position of the lower and upper harmonic restraints
lowerWall 20
lowerWallConstant 100
upperWall 50
upperWallConstant 100
# boundaries that defines the lowest and highest allowed value
# used to define the grids of values for the colvar
lowerBoundary 20
upperBoundary 50
# grid spacing
width 0.5
}

metadynamics {
  name meta450_516
  colvars dist_450_516
  # Gaussian parameters
  hillWeight 0.01
  hillWidth 0.5
  newHillFrequency 1000
  useGrids on
  ebMeta on
  # targeted input distance distribution file
  targetdistfile deer_450_516.dat
  # number of equilibration steps
  ebMetaEquilSteps 100000
  # turn on the Gaussian reflection
  useHillsReflection on
  # limits of the Gaussian reflection
  # outside these limits the bias force
  # is turned to zero
  reflectionLowLimit 20
  reflectionUpLimit 50
  writeHillsTrajectory on
}

```

**PLUMED format**

```
# output frequency
PRINT W_STRIDE 250

# Gaussian parameters
HILLS HEIGHT 0.01 W_STRIDE 1000

# selection of groups for defining a distance, with the center
# of mass of the N and O atoms from the spin label on 450 and
# the center of mass of the N and O atoms from the spin label on 516

DISTANCE LIST <g450> <g516> SIGMA 0.5 NOPBC

g450->
6004 6005
g450<-

g516->
6980 6981
g516<-

# targeted input distance distribution file
PROBRES CV 1 PROBFIELD deer_450_516.dat

# boundary condition to prevent sampling of region outside of distribution
LWALL CV 1 LIMIT 20 KAPPA 100

UWALL CV 1 LIMIT 50 KAPPA 100

# limits of the Gaussian reflection applied at the boundaries
INVERT CV 1 REFLECTION 6 INVERSION 12 MAXHEIGHT 5 LIMIT1 20.0 LIMIT2 50.0

# zeros out any bias forces outside the interval
INTERVAL CV 1 LOWER_LIMIT 20.0 UPPER_LIMIT 50.0

ENDMETA
```
